# Supplementary material for: RPL22L1 is a novel biomarker for prognosis and immune infiltration in lung adenocarcinoma, promoting the growth and metastasis of LUAD cells by inhibiting the MDM2/P53 signaling pathway
Source: publisher site journal article supplement (doi:10.18632/aging.206096), 2024-08-28
Supplement: Supplementary file [file aging-v16i17-206096-supplementary-material-SD1.pdf]

## SUPPLEMENTARY TABLES

**Supplementary Table 1. The correlation between the expression of RPL22L1 in LUAD and clinical features.**

| Characteristics                      | Overall    | Low expression of RPL22L1 | High expression of RPL22L1 | p-value | Statistic | Method     |
|--------------------------------------|------------|---------------------------|----------------------------|---------|-----------|------------|
| n                                    | 539        | 269                       | 270                        |         |           |            |
| Pathologic T stage, n (%)            |            |                           |                            | 0.136   | 2.225     | Chisq test |
| T1&T2                                | 468(87.3%) | 238 (44.4%)               | 230 (42.9%)                |         |           |            |
| T3&T4                                | 68(12.7%)  | 28 (5.2%)                 | 40 (7.5%)                  |         |           |            |
| Pathologic N stage, n (%)            |            |                           |                            | 0.263   | 1.253     | Chisq test |
| N0                                   | 350(66.9%) | 176 (33.7%)               | 174 (33.3%)                |         |           |            |
| N1&N2&N3                             | 173(33.1%) | 78 (14.9%)                | 95 (18.2%)                 |         |           |            |
| Pathologic stage, n (%)              |            |                           |                            | 0.011   | 6.491     | Chisq test |
| Stage I&Stage II                     | 421(79.3%) | 222 (41.8%)               | 199 (37.5%)                |         |           |            |
| Stage III&Stage IV                   | 110(20.7%) | 43 (8.1%)                 | 67 (12.6%)                 |         |           |            |
| Gender, n (%)                        |            |                           |                            | 0.001   | 10.511    | Chisq test |
| Female                               | 289(53.6%) | 163 (30.2%)               | 126 (23.4%)                |         |           |            |
| Male                                 | 250(46.4%) | 106 (19.7%)               | 144 (26.7%)                |         |           |            |
| Age, n (%)                           |            |                           |                            | 0.860   | 0.031     | Chisq test |
| <= 65                                | 257(49.4%) | 127 (24.4%)               | 130 (25%)                  |         |           |            |
| > 65                                 | 263(50.6%) | 132 (25.4%)               | 131 (25.2%)                |         |           |            |
| Anatomic neoplasm subdivision, n (%) |            |                           |                            | 0.218   | 1.519     | Chisq test |
| Left                                 | 207(39.5%) | 110 (21%)                 | 97 (18.5%)                 |         |           |            |
| Right                                | 317(60.5%) | 151 (28.8%)               | 166 (31.7%)                |         |           |            |

**Supplementary Table 2. Abbreviations for 33 types of tumors in TCGA.**

| <b>Full name of tumors</b>                                       | <b>Abbreviation of tumors</b> |
|------------------------------------------------------------------|-------------------------------|
| Adrenocortical carcinoma                                         | ACC                           |
| Bladder urothelial carcinoma                                     | BLCA                          |
| Breast invasive carcinoma                                        | BRCA                          |
| Cervical squamous cell carcinoma and endocervical adenocarcinoma | CESC                          |
| Cholangiocarcinoma                                               | CHOL                          |
| Colon adenocarcinoma                                             | COAD                          |
| Lymphoid neoplasm diffuse large B-cell lymphoma                  | DLBC                          |
| Esophageal carcinoma                                             | ESCA                          |
| Glioblastoma multiforme                                          | GBM                           |
| Head and neck squamous cell carcinoma                            | HNSC                          |
| Kidney chromophobe                                               | KICH                          |
| Kidney renal clear cell carcinoma                                | KIRC                          |
| Kidney renal papillary cell carcinoma                            | KIRP                          |
| Acute myeloid leukemia                                           | LAML                          |
| Brain lower grade glioma                                         | LGG                           |
| Liver hepatocellular carcinoma                                   | LIHC                          |
| Lung adenocarcinoma                                              | LUAD                          |
| Lung squamous cell carcinoma                                     | LUSC                          |
| Mesothelioma                                                     | MESO                          |
| Ovarian serous cystadenocarcinoma                                | OV                            |
| Pancreatic adenocarcinoma                                        | PAAD                          |
| Pheochromocytoma and paraganglioma                               | PCPG                          |
| Prostate adenocarcinoma                                          | PRAD                          |
| Rectum adenocarcinoma                                            | READ                          |
| Sarcoma                                                          | SARC                          |
| Skin cutaneous melanoma                                          | SKCM                          |
| Stomach adenocarcinoma                                           | STAD                          |
| Testicular germ cell tumors                                      | TGCT                          |
| Thyroid carcinoma                                                | THCA                          |
| Thymoma                                                          | THYM                          |
| Uterine corpus endometrial carcinoma                             | UCEC                          |
| Uterine carcinosarcoma                                           | UCS                           |
| Uveal melanoma                                                   | UVM                           |

**Supplementary Table 3. The expression of RPL22L1 in LUAD is related to clinical features (logical analysis).**

| <b>Characteristics</b>                                     | <b>Total (N)</b> | <b>OR (95% CI)</b>    | <b>P-value</b> |
|------------------------------------------------------------|------------------|-----------------------|----------------|
| Pathologic T stage (T3&T4 vs. T1&T2)                       | 536              | 1.478 (0.883 - 2.476) | 0.137          |
| Pathologic N stage (N1&N2&N3 vs. N0)                       | 523              | 1.232 (0.855 - 1.776) | 0.263          |
| Pathologic stage (Stage III&Stage IV vs. Stage I&Stage II) | 531              | 1.738 (1.133 - 2.667) | 0.011          |
| Gender (Male vs. Female)                                   | 539              | 1.757 (1.248 - 2.474) | 0.001          |
| Age (> 65 vs. <= 65)                                       | 520              | 0.970 (0.687 - 1.367) | 0.86           |
| Anatomic neoplasm subdivision (Right vs. Left)             | 524              | 1.247 (0.878 - 1.771) | 0.218          |

**Supplementary Table 4. Univariate and multivariate analysis (Cox regression) of clinical features of LUAD and DSS.**

| <b>Characteristics</b>                                     | <b>Total (N)</b> | <b>Univariate analysis</b> |                | <b>Multivariate analysis</b> |                |
|------------------------------------------------------------|------------------|----------------------------|----------------|------------------------------|----------------|
|                                                            |                  | <b>HR (95% CI)</b>         | <b>P-value</b> | <b>HR (95% CI)</b>           | <b>P-value</b> |
| Pathologic T stage (T1&T2 vs. T3&T4)                       | 527              | 2.352 (1.614 - 3.426)      | < 0.001        | 1.663 (1.087 - 2.546)        | 0.019          |
| Pathologic N stage (N0 vs. N1&N2&N3)                       | 514              | 2.547 (1.904 - 3.407)      | < 0.001        | 2.153 (1.524 - 3.041)        | < 0.001        |
| Pathologic stage (Stage I&Stage II vs. Stage III&Stage IV) | 522              | 2.710 (1.994 - 3.685)      | < 0.001        | 1.403 (0.933 - 2.109)        | 0.103          |
| Gender (Female vs. Male)                                   | 530              | 1.087 (0.816 - 1.448)      | 0.569          |                              |                |
| Age (<= 65 vs. > 65)                                       | 520              | 1.216 (0.910 - 1.625)      | 0.186          |                              |                |
| Anatomic neoplasm subdivision (Left vs. Right)             | 516              | 1.040 (0.772 - 1.401)      | 0.797          |                              |                |
| RPL22L1 (Low vs. High)                                     | 530              | 1.521 (1.132 - 2.044)      | 0.005          | 1.542 (1.138 - 2.090)        | 0.005          |
